# Supplementary figures and images for: P4HB, a Novel Hypoxia Target Gene Related to Gastric Cancer Invasion and Metastasis
Source: Hindawi journal article supplement (doi:10.1155/2019/9749751), 2019-07-30

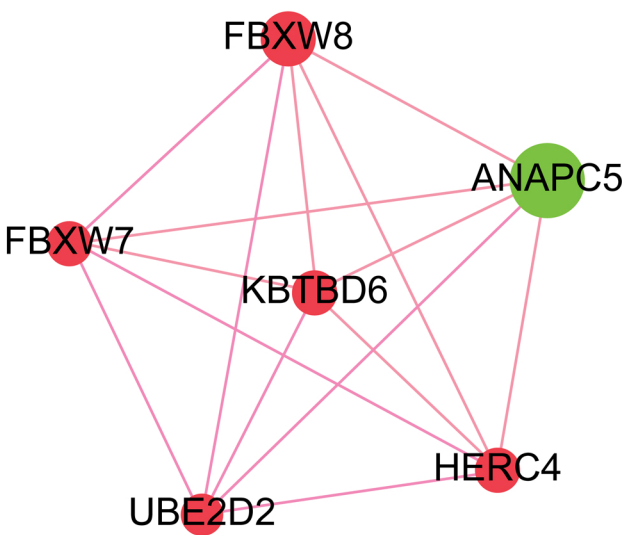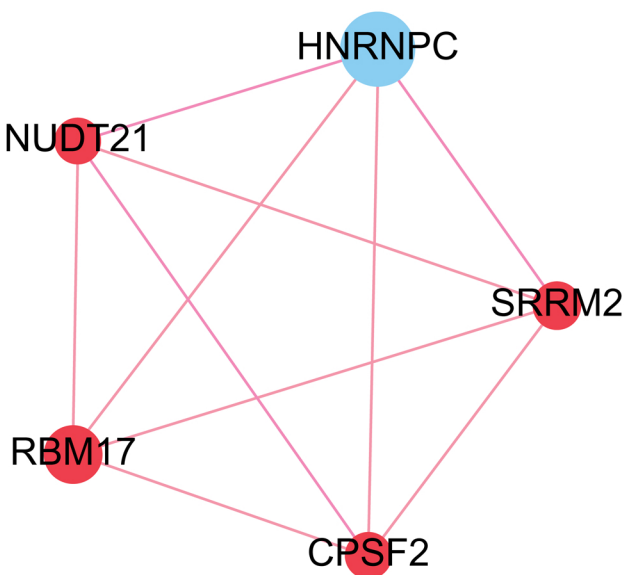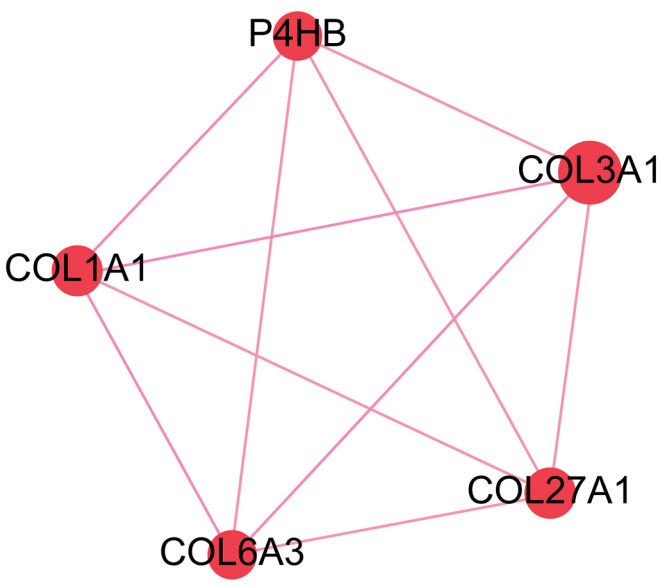

Supplement: f1 [file 9749751.f1.zip]
